# Supplementary material for: The Interaction of Fluorinated Glycomimetics with DC-SIGN: Multiple Binding Modes Disentangled by the Combination of NMR Methods and MD Simulations
Source: PubMed Central journal article supplement (PMC7463913; doi:10.3390/ph13080179), 2020-08-04
Supplement: pharmaceuticals-13-00179-s001.pdf [file pharmaceuticals-13-00179-s001.pdf]

# Supporting information

## Synthesis of **1c** and **1d**

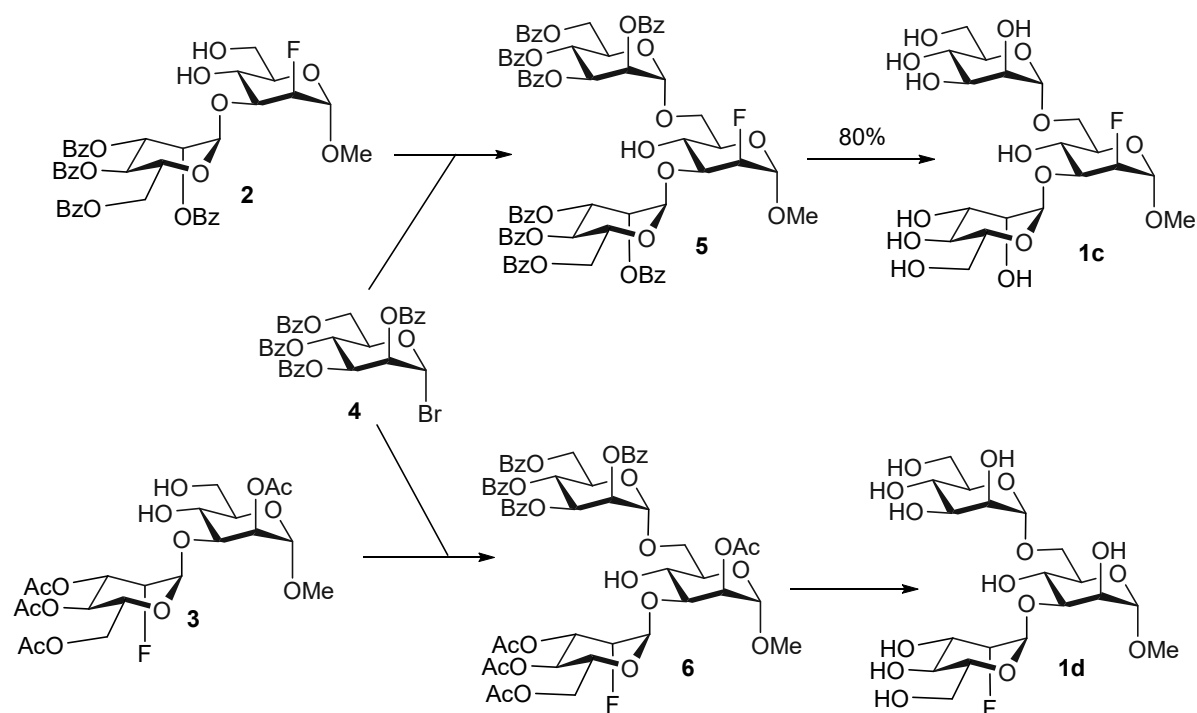

**Scheme S1.** Synthesis of compounds **1c** and **1d**.

Methyl 2,3,4,6-tetra-O-benzoyl- $\alpha$ -D-mannopyranosyl-(1 $\rightarrow$ 3)-[2,3,4,6-tetra-O-benzoyl- $\alpha$ -D-mannopyranosyl-(1 $\rightarrow$ 6)-]-2-deoxy-2-fluoro- $\alpha$ -D-mannopyranoside (**5**)

4,6-diol acceptor **2** and donor **4** were coupled to give trisaccharide **5** (55%).  $R_f$  0.38 (toluene/EtOAc, 7:1).  $[\alpha]_D^{20}$  -32.1 (c 1.0; CHCl<sub>3</sub>). <sup>1</sup>H NMR (500 MHz, CDCl<sub>3</sub>)  $\delta$  8.16 – 8.00 (m, 10H; H<sub>Ar</sub>), 7.99 – 7.94 (m, 2H; H<sub>Ar</sub>), 7.84 (m, 4H; H<sub>Ar</sub>), 7.58 (m, 4H; H<sub>Ar</sub>), 7.53 – 7.33 (m, 16H; H<sub>Ar</sub>), 7.31 – 7.22 (m, 4H; H<sub>Ar</sub>), 6.15 – 6.05 (m, 2H; H-4', H-4''), 6.01 – 5.93 (m, 2H; H-3', H-3''), 5.85 (dd,  $J_{2',3'} = 3.3$  Hz,  $J_{2',1'} = 1.8$  Hz, 1H; H-2'), 5.79 (dd,  $J_{2'',3''} = 3.4$  Hz,  $J_{2'',1''} = 1.8$  Hz, 1H; H-2''), 5.38 (d,  $J_{1',2'} = 1.8$  Hz, 1H; H-1'), 5.23 (d,  $J_{1'',2''} = 1.8$  Hz, 1H; H-1''), 5.05 – 4.89 (m, 1H; H-2), 4.81 – 4.66 (m, 4H; H-1, H-5', H-6'a, H-6''a), 4.63 (ddd,  $J_{5'',4''} = 10.1$  Hz,  $J_{5'',6''a} = 4.5$  Hz,  $J_{5'',6''b} = 2.5$  Hz, 1H; H-5''), 4.53 (m, 2H; H-6'b, H-6''b), 4.12 (m, 2H; H-4, H-6a), 4.04 – 3.85 (m, 3H; H-6b, H-3, H-5), 3.45 – 3.36 (m, 3H; OCH<sub>3</sub>), 3.32 ppm (d,  $J_{OH,4} = 3.5$  Hz, 1H; OH-4). <sup>13</sup>C NMR (126 MHz, CDCl<sub>3</sub>)  $\delta$  166.24, 166.05, 165.62, 165.58, 165.51, 165.44, 165.38, 165.29 (8 COPh), 133.52, 133.46, 133.38, 133.33, 133.24, 133.07, 133.01, 129.96-128.25 (48 C<sub>Ar</sub>), 99.95 (C-1'), 98.28 (d,  $J = 29.1$  Hz; C-1), 97.63 (C-1''), 88.13 (d,  $J = 177.6$  Hz; C-2), 81.42 (d,  $J = 17.1$  Hz; C-3), 71.19 (C-5), 70.49 (C-2''), 70.33 (C-2'), 70.21, 70.07 (C-3'', C-3'), 69.62 (C-5'), 68.85 (C-5''), 66.86 (C-6), 67.12, 66.69 (C-4', C-4''), 65.90 (C-4), 63.04, 62.97 (C-6'', C-6'), 55.22 ppm (OCH<sub>3</sub>). <sup>19</sup>F NMR (376 MHz, CDCl<sub>3</sub>)  $\delta$  -203.00 ppm (ddd,  $J_{F,2} = 49.2$  Hz,  $J_{F,3} = 29.4$  Hz,  $J_{F,1} = 7.5$  Hz; 1F, F-2). HR-MS (ESI) [M+Na]<sup>+</sup>  $m/z$  calcd for C<sub>75</sub>H<sub>65</sub>O<sub>23</sub>FNa 1375.3798; found 1375.3844.

Methyl  $\alpha$ -D-mannopyranosyl-(1 $\rightarrow$ 3)-[ $\alpha$ -D-mannopyranosyl-(1 $\rightarrow$ 6)-]-2-deoxy-2-fluoro- $\alpha$ -D-mannopyranoside (**1c**)

Compound **5** was deacylated to give **1c** (91%).  $R_f$  0.11 (EtOAc/MeOH/water, 7:2:1).  $[\alpha]_D^{20} + 79.6$  (c 0.25; water).  $^1\text{H NMR}$  (400 MHz,  $\text{D}_2\text{O}$ )  $\delta$  5.00 (as, 1H; H-1'), 4.92 – 4.74 (m, 3H; H-1, H-2, H-1''), 3.98 – 3.90 (m, 2H; H-2', 1H-6), 3.90 – 3.50 (m, 15H), 3.32 ppm (s, 3H;  $\text{OCH}_3$ ).  $^{13}\text{C NMR}$  (101 MHz,  $\text{D}_2\text{O}$ )  $\delta$  102.45 (C-1'), 99.41 (C-1''), 98.00 (d,  $J = 29.3$  Hz; C-1), 88.78 (d,  $J = 172.9$  Hz; C-2), 77.92 (d,  $J = 16.8$  Hz; C-3), 73.27, 72.65, 70.61, 70.53, 70.30, 69.87, 69.82, 66.61 (overlapping), 65.37, 64.82, 60.88, 60.86, 55.11 ppm ( $\text{OCH}_3$ ).  $^{19}\text{F NMR}$  (376 MHz,  $\text{D}_2\text{O}$ )  $\delta$  -204.15 ppm (ddd,  $J_{F,2} = 49.1$  Hz,  $J_{F,3} = 32.9$  Hz,  $J_{F,1} = 7.3$  Hz; 1F, F-2). HR-MS (ESI)  $[\text{M}+\text{Na}]^+$   $m/z$  calcd for  $\text{C}_{19}\text{H}_{33}\text{O}_{15}\text{FNa}$  543.1701; found 543.1687.

Methyl 3,4,6-tri-O-acetyl-2-deoxy-2-fluoro- $\alpha$ -D-mannopyranosyl-(1 $\rightarrow$ 3)-[2,3,4,6-tetra-O-benzoyl- $\alpha$ -D-mannopyranosyl-(1 $\rightarrow$ 6)-]-2-O-acetyl- $\alpha$ -D-mannopyranoside (**6**)

4,6-diol acceptor **3** and donor **4** were coupled to yield **6** (64%).  $R_f$  0.31 (toluene/EtOAc, 2:1).  $[\alpha]_D^{20} + 10.9$  (c 1.0;  $\text{CHCl}_3$ ).  $^1\text{H NMR}$  (500 MHz,  $\text{CDCl}_3$ )  $\delta$  8.12 – 8.01 (m, 4H;  $\text{H}_{\text{Ar}}$ ), 7.97 – 7.92 (m, 2H;  $\text{H}_{\text{Ar}}$ ), 7.85 – 7.79 (m, 2H;  $\text{H}_{\text{Ar}}$ ), 7.62-7.54 (m, 2H;  $\text{H}_{\text{Ar}}$ ), 7.53-7.47 (m, 1H;  $\text{H}_{\text{Ar}}$ ), 7.46-7.33 (m, 7H;  $\text{H}_{\text{Ar}}$ ), 7.29 – 7.22 (m, 2H;  $\text{H}_{\text{Ar}}$ ), 6.12 (at,  $J_{4'',3''} = J_{4'',5''} = 10.0$  Hz, 1H; H-4''), 5.94 (dd,  $J_{3'',4''} = 10.0$  Hz,  $J_{3'',2''} = 3.2$  Hz, 1H; H-3''), 5.78 (dd,  $J_{2'',3''} = 3.2$  Hz,  $J_{2'',1''} = 1.8$  Hz, 1H; H-2''), 5.40 (dd,  $J_{1',F} = 7.3$  Hz,  $J_{1',2'} = 1.3$  Hz, 1H; H-1'), 5.34 (at,  $J_{4',3'} = J_{4',5'} = 10.1$  Hz, 1H; H-4'), 5.27 (d,  $J_{1'',2''} = 1.8$  Hz, 1H; H-1''), 5.26 – 5.16 (m, 2H; H-2, H-3'), 4.88 (m, 1H; H-2'), 4.77 – 4.70 (m, 2H; H-6''a, H-1), 4.58 – 4.48 (m, 2H; H-5'', H-6''b), 4.27 (dd,  $J_{6'a,6'b} = 12.3$  Hz,  $J_{6'a,5'} = 5.7$  Hz, 1H; H-6'a), 4.20 – 4.07 (m, 5H; H-5', H-6'b, H-6a, H-4, H-3), 3.95 (dd,  $J_{6b,6a} = 11.6$  Hz,  $J_{6b,5} = 1.9$  Hz, 1H; H-6b), 3.81-3.75 (m, 1H; H-5), 3.41 (s, 3H;  $\text{OCH}_3$ ), 2.83 (d,  $J_{\text{OH},4} = 4.6$  Hz, 1H; OH-4), 2.16, 2.11, 2.09, 2.07 ppm (4s, 12 H; 4  $\text{OCOCH}_3$ ).  $^{13}\text{C NMR}$  (125 MHz,  $\text{CDCl}_3$ )  $\delta$  170.70, 170.56, 170.14, 169.56, (4  $\text{OCOCH}_3$ ), 166.30, 165.49, 165.46, 165.20 (4  $\text{COPh}$ ), 133.43, 133.41, 133.18, 133.08, 129.82 -128.29 (24  $\text{C}_{\text{Ar}}$ ), 98.86 ( $J = 29.9$  Hz; C-1'), 98.51 (C-1), 98.07 (C-1''), 86.79 ( $J = 180.0$  Hz; C-2'), 77.13, 71.65 (C-5), 71.25 (C-2), 70.30 (C-2''), 70.00 (C-3''), 69.85 ( $J = 16.8$  Hz; C-3'), 69.43, 68.88 (C-5''), 67.12 (C-4''), 66.96, 66.39 (C-6), 65.56 (C-4'), 62.95 (C-6''), 62.18 (C-6'), 55.13 ( $\text{OCH}_3$ ), 20.75, 20.73, 20.67, 20.59 ppm (4  $\text{OCOCH}_3$ ).  $^{19}\text{F NMR}$  (376 MHz,  $\text{CDCl}_3$ )  $\delta$  -203.61 ppm (ddd,  $J_{F,2'} = 49.4$  Hz,  $J_{F,3'} = 28.2$  Hz,  $J_{F,1'} = 7.3$  Hz; 1F, 2'-F). HR-MS (ESI)  $[\text{M}+\text{Na}]^+$   $m/z$  calcd for  $\text{C}_{55}\text{H}_{57}\text{O}_{23}\text{F}$  1127.3172; found 1127.3116.

Methyl 2-deoxy-2-fluoro- $\alpha$ -D-mannopyranosyl-(1 $\rightarrow$ 3)-[ $\alpha$ -D-mannopyranosyl-(1 $\rightarrow$ 6)-]- $\alpha$ -D-mannopyranoside (**1d**)

Compound **6** was deacylated to give trisaccharide **1d** (80%).  $R_f$  0.15 (EtOAc/MeOH/ $\text{H}_2\text{O}$ , 7:2:1).  $[\alpha]_D^{20} + 99.0$  (c 0.5; water).  $^1\text{H NMR}$  (500 MHz,  $\text{D}_2\text{O}$ )  $\delta$  5.16 (dd,  $J_{1',F} = 8.0$  Hz,  $J_{1',2'} = 1.8$  Hz, 1H; H-1'), 4.80 – 4.64 (m, 2H; H-1'', H-2'), 4.57 (as, 1H; H-1), 3.94 (as, 1H; H-2) 3.89 – 3.71 (m, 7H), 3.70 – 3.47 (m, 9H), 3.25 ppm (s, 1H;  $\text{OCH}_3$ ).  $^{13}\text{C NMR}$  (126 MHz,  $\text{D}_2\text{O}$ )  $\delta$  100.96 (C-1), 99.44 (C-1''), 99.32 (d,  $J = 30.4$  Hz; C-1'), 89.55 (d,  $J = 172.3$  Hz; C-2'), 79.06, 73.27, 72.71, 70.81, 70.60, 69.96, 69.60 (d,  $J = 17.5$  Hz; C-3'), 69.49, 66.73, 66.66, 65.52, 65.21, 60.95, 60.50, 54.85 ppm ( $\text{OCH}_3$ ).  $^{19}\text{F NMR}$  (376 MHz,  $\text{D}_2\text{O}$ ) -204.73 ppm (ddd,  $J_{F,2'} = 49.3$  Hz,  $J_{F,3'} = 31.6$  Hz,  $J_{F,1'} = 8.0$  Hz; 1F; F-2'). HR-MS (ESI)  $[\text{M}+\text{Na}]^+$   $m/z$  calcd for  $\text{C}_{19}\text{H}_{33}\text{O}_{15}\text{FNa}$  543.1701; found 543.1709.

## NMR experiments

Table S2: <sup>1</sup>H and <sup>19</sup>F NMR assignment of compounds 1, 2 and 3

**Table S2a.** 2-F-Man<sub>3</sub>, compound 1.

| Position     | <i>ManI</i>    |                 | <i>ManII</i>   |                 | <i>ManIII</i>  |                 |
|--------------|----------------|-----------------|----------------|-----------------|----------------|-----------------|
|              | <sup>1</sup> H | <sup>19</sup> F | <sup>1</sup> H | <sup>19</sup> F | <sup>1</sup> H | <sup>19</sup> F |
| <b>1</b>     | 5.27           |                 | 5.06           |                 | 4.90           |                 |
| <b>2</b>     | 4.81           | -204.86         | 4.75           | -205.97         | 4.89           | -204.21         |
| <b>3</b>     | 3.87           |                 | 3.83           |                 | 3.92           |                 |
| <b>4</b>     | 3.66           |                 | 3.66           |                 | 3.86           |                 |
| <b>5</b>     | 3.75           |                 | 3.66           |                 | 3.82           |                 |
| <b>6, 6'</b> | 3.82, 3.73     |                 | 3.82, 3.73     |                 | 4.03, 3.72     |                 |
| <b>Me</b>    |                |                 |                |                 | 3.37           |                 |

**Table S2b.** 2-F-Man<sub>2,α1-3</sub>, compound 2.

| Position     | <i>ManI</i>    |                 | <i>ManII</i>   |                 |
|--------------|----------------|-----------------|----------------|-----------------|
|              | <sup>1</sup> H | <sup>19</sup> F | <sup>1</sup> H | <sup>19</sup> F |
| <b>1</b>     | 5.28           |                 | 4.91           |                 |
| <b>2</b>     | 4.81           | -204.82         | 4.87           | -204.03         |
| <b>3</b>     | 3.87           |                 | 3.92           |                 |
| <b>4</b>     | 3.65           |                 | 3.75           |                 |
| <b>5</b>     | 3.75           |                 | 3.65           |                 |
| <b>6, 6'</b> | 3.81, 3.73     |                 | 3.83, 3.73     |                 |
| <b>Me</b>    |                |                 | 3.37           |                 |

**Table S2c.** 2-F-Man<sub>2,α1-6</sub>, compound 3.

| Position     | <i>ManI</i>    |                 | <i>ManII</i>   |                 |
|--------------|----------------|-----------------|----------------|-----------------|
|              | <sup>1</sup> H | <sup>19</sup> F | <sup>1</sup> H | <sup>19</sup> F |
| <b>1</b>     | 5.07           |                 | 4.90           |                 |
| <b>2</b>     | 4.75           | -205.86         | 4.70           | -206.00         |
| <b>3</b>     | 3.83           |                 | 3.76           |                 |
| <b>4</b>     | 3.66           |                 | 3.73           |                 |
| <b>5</b>     | 3.66           |                 | 3.75           |                 |
| <b>6, 6'</b> | 3.83, 3.73     |                 | 4.00, 3.74     |                 |
| <b>Me</b>    |                |                 | 3.37           |                 |

## <sup>19</sup>F-R<sub>2</sub> filtered experiments

The K<sub>D</sub> of compounds **1**, **1b-d**, **2** and **3** was estimated applying a <sup>19</sup>F-R<sub>2</sub> filtered approach. 6-F-ManαOMe, which weakly binds to DC-SIGN, was selected as the spy molecule. Relaxation rates R<sub>2</sub> were determined employing a CPMG pulse sequence, by fitting the observed <sup>19</sup>F signal intensity to the exponential decay curve:

$$I(t) = I_0 e^{-tR_2} = I_0 e^{-n2\tau R_2} \quad (1)$$

where  $I(t)$  refers to intensity at time  $t$ ,  $I_0$  is intensity at  $t = 0$ , and  $R_2$  is the transversal relaxation rate ( $R_2 = 1/T_2$ ).

In the limit of fast-exchange where the exchange contribution to the observed transversal relaxation rate  $R_{2,obs}$  is insignificant (Figure S1, a)), the following equations apply:

$$R_{2,obs} = R_{2,f} + (R_{2,b} - R_{2,f})p_b \quad (2)$$

$$p_b = \frac{[P]_T + [L]_T + K_D - \sqrt{([P]_T + [L]_T + K_D)^2 - 4[P]_T[L]_T}}{2[L]_T} \quad (3)$$

where  $[P]_T$  and  $[L]_T$  are the total protein and ligand concentration respectively,  $[R]_{2,f}$  and  $[R]_{2,b}$  are the relaxation rates in the free and bound states,  $p_b$  is the fraction of bound ligand and  $K_D$  the dissociation constant of the protein-ligand complex.  $[R]_{2,f}$  of 6-F-ManαOMe was measured in absence of the lectin, and Equation 2 was used to estimate  $K_D$  and  $[R]_{2,b}$  for the complex (Figure S1, b)).

Then,  $K_I$  of compounds **1**, **1b-d**, **2** and **3** was measured in a competitive manner.  $R_{2,obs}$  of 6-F-ManαOMe (spy molecule) in solution with DC-SIGN ECD was monitored at 5 different competitor concentrations ( $[I]$ ) in each case with a fixed  $[P]_T/[L]_T$  ratio (Figure S1, c)), to derive  $K_I$  by fitting to Equation 2 with  $p_b$  as defined in Equations (4) and (5) (Table 2):

$$p_b = \frac{2 \cos(\theta/3) \sqrt{a^2 - 3b} - a}{3K_D + 2 \cos(\theta/3) \sqrt{a^2 - 3b} - a} \quad (4)$$

$$\theta = \cos^{-1} \left( \frac{-2a^3 + 9ab - 27c}{2\sqrt{(a^2 - 3b)^3}} \right), a = K_D + K_I + [L]_T + [I]_T - [P]_T, \quad (5)$$

$$b = ([I]_T - [P]_T)K_D + ([L]_T - [P]_T)K_D + K_I K_D, c = -K_I K_D [P]_T$$

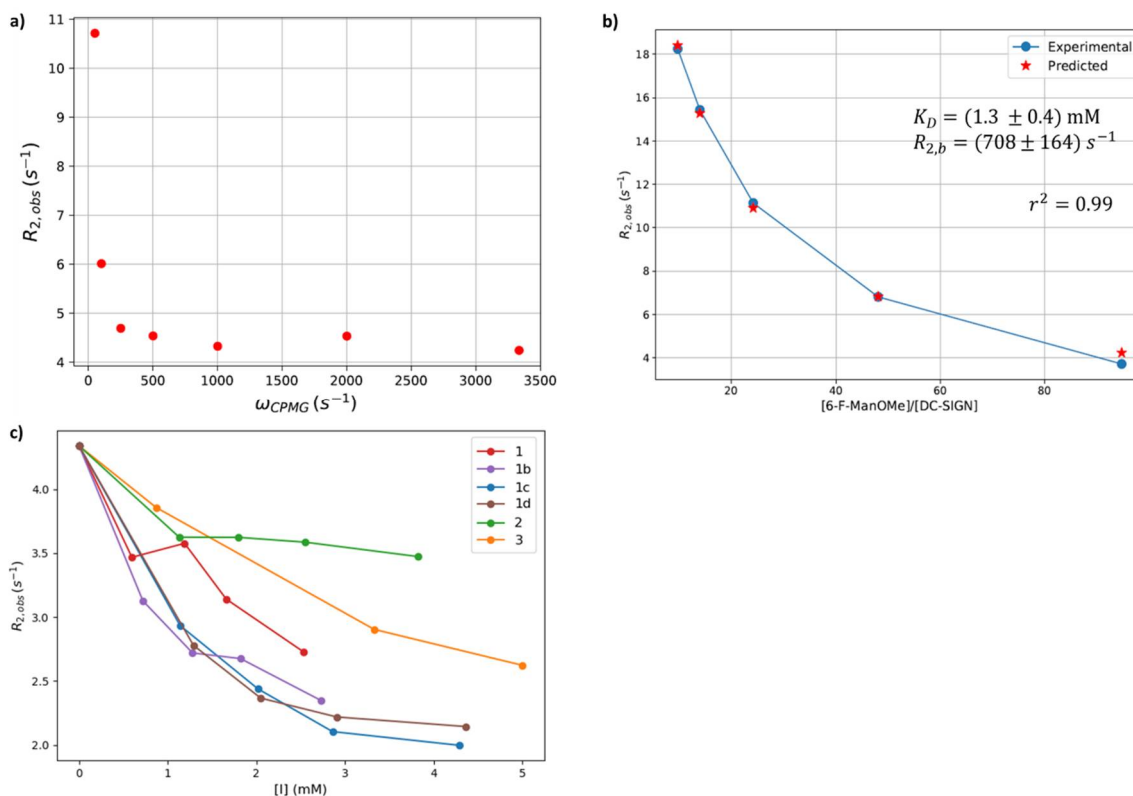

**Figure S1.  $^{19}F$ - $R_2$  filtered experiments.** a) Relaxation dispersion experiment for 6-F-Man $\alpha$ OMe (the spy molecule).  $R_{2,obs}$  of the  $^{19}F$  nucleus is measured for different values of  $\omega_{CPMG}$ . Ligand and protein sample concentrations were:  $[6-F-Man\alpha OMe] = 400$   $\mu$ M,  $[DC-SIGN (CRDs)] = 10$   $\mu$ M (counting concentration of CRDs, i.e, 4 CRDs per DC-SIGN ECD tetramer). For  $\omega_{CPMG} > 1000$  s $^{-1}$ , there is virtually negligible exchange contribution to  $R_2$ . Therefore, all the subsequent  $R_2$  filtered experiments were carried out with  $\tau_{CPMG} = 1/\omega_{CPMG} = 1$  ms. b)  $K_D$  determination of 6-F-Man $\alpha$ OMe with DC-SIGN.  $R_{2,obs}$  was measured for increasing amounts of  $[6-F-Man\alpha OMe]/[DC-SIGN (CRDs)]$  (blue dots).  $K_D$  and  $R_{2,b}$  were obtained from fitting to Equation 2, which is valid in the fast-exchange regime ( $R_{ex} = 0$ ) [39a]. The predicted values at each  $[6-F-Man\alpha OMe]/[DC-SIGN (CRDs)]$  are shown as red stars for comparison c) Titration curves showing the variation in  $^{19}F$ - $R_{2,obs}$  of the spy molecule 6-F-Man $\alpha$ OMe, when increasing amounts of the competitors (I) **1**, **1b-d**, **2** and **3** are added to a mixture  $[6-F-Man\alpha OMe] = 400$   $\mu$ M,  $[DC-SIGN (CRDs)] = 10$   $\mu$ M.

## MD simulations

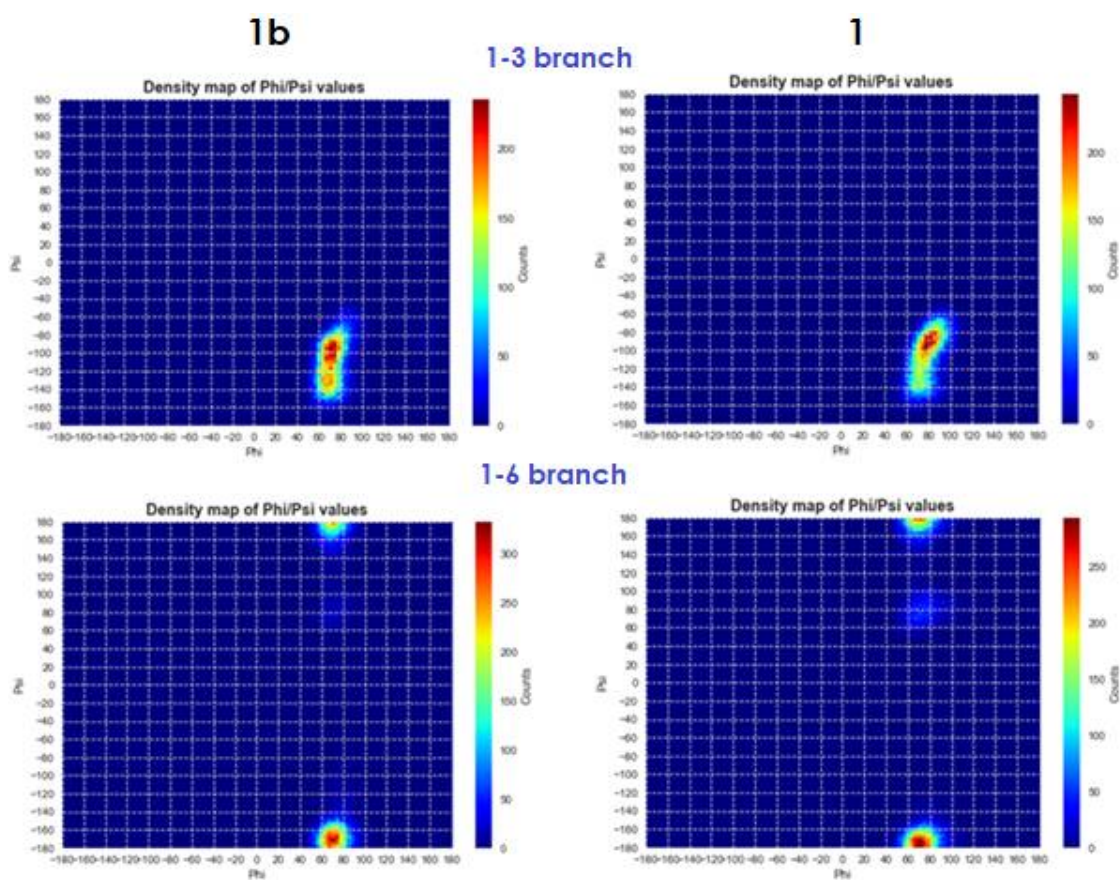

**Figure S2. Conformational maps.** Density of conformers populations around  $\phi/\psi$  torsion angles computed for **1** and **1b** during a 500 ns MD simulation in explicit TIP3P water.  $\phi$  and  $\psi$  torsion angles are defined as  $O5(i)-C1(i)-O_n(i-1)-C_n(i-1)$  and  $C1(i)-O_n(i-1)-C_n(i-1)-C(n-1)(i-1)$  respectively, where  $n$  indicates ring position and  $i$  a given residue. For **1b**, the GLYCAM 06-j [40] forcefield was employed, whereas GAFF2 [44] was used for **1**. The MD protocol in both simulations is described in the Materials and Methods section. The maps are fairly similar, independently of the employed force field.

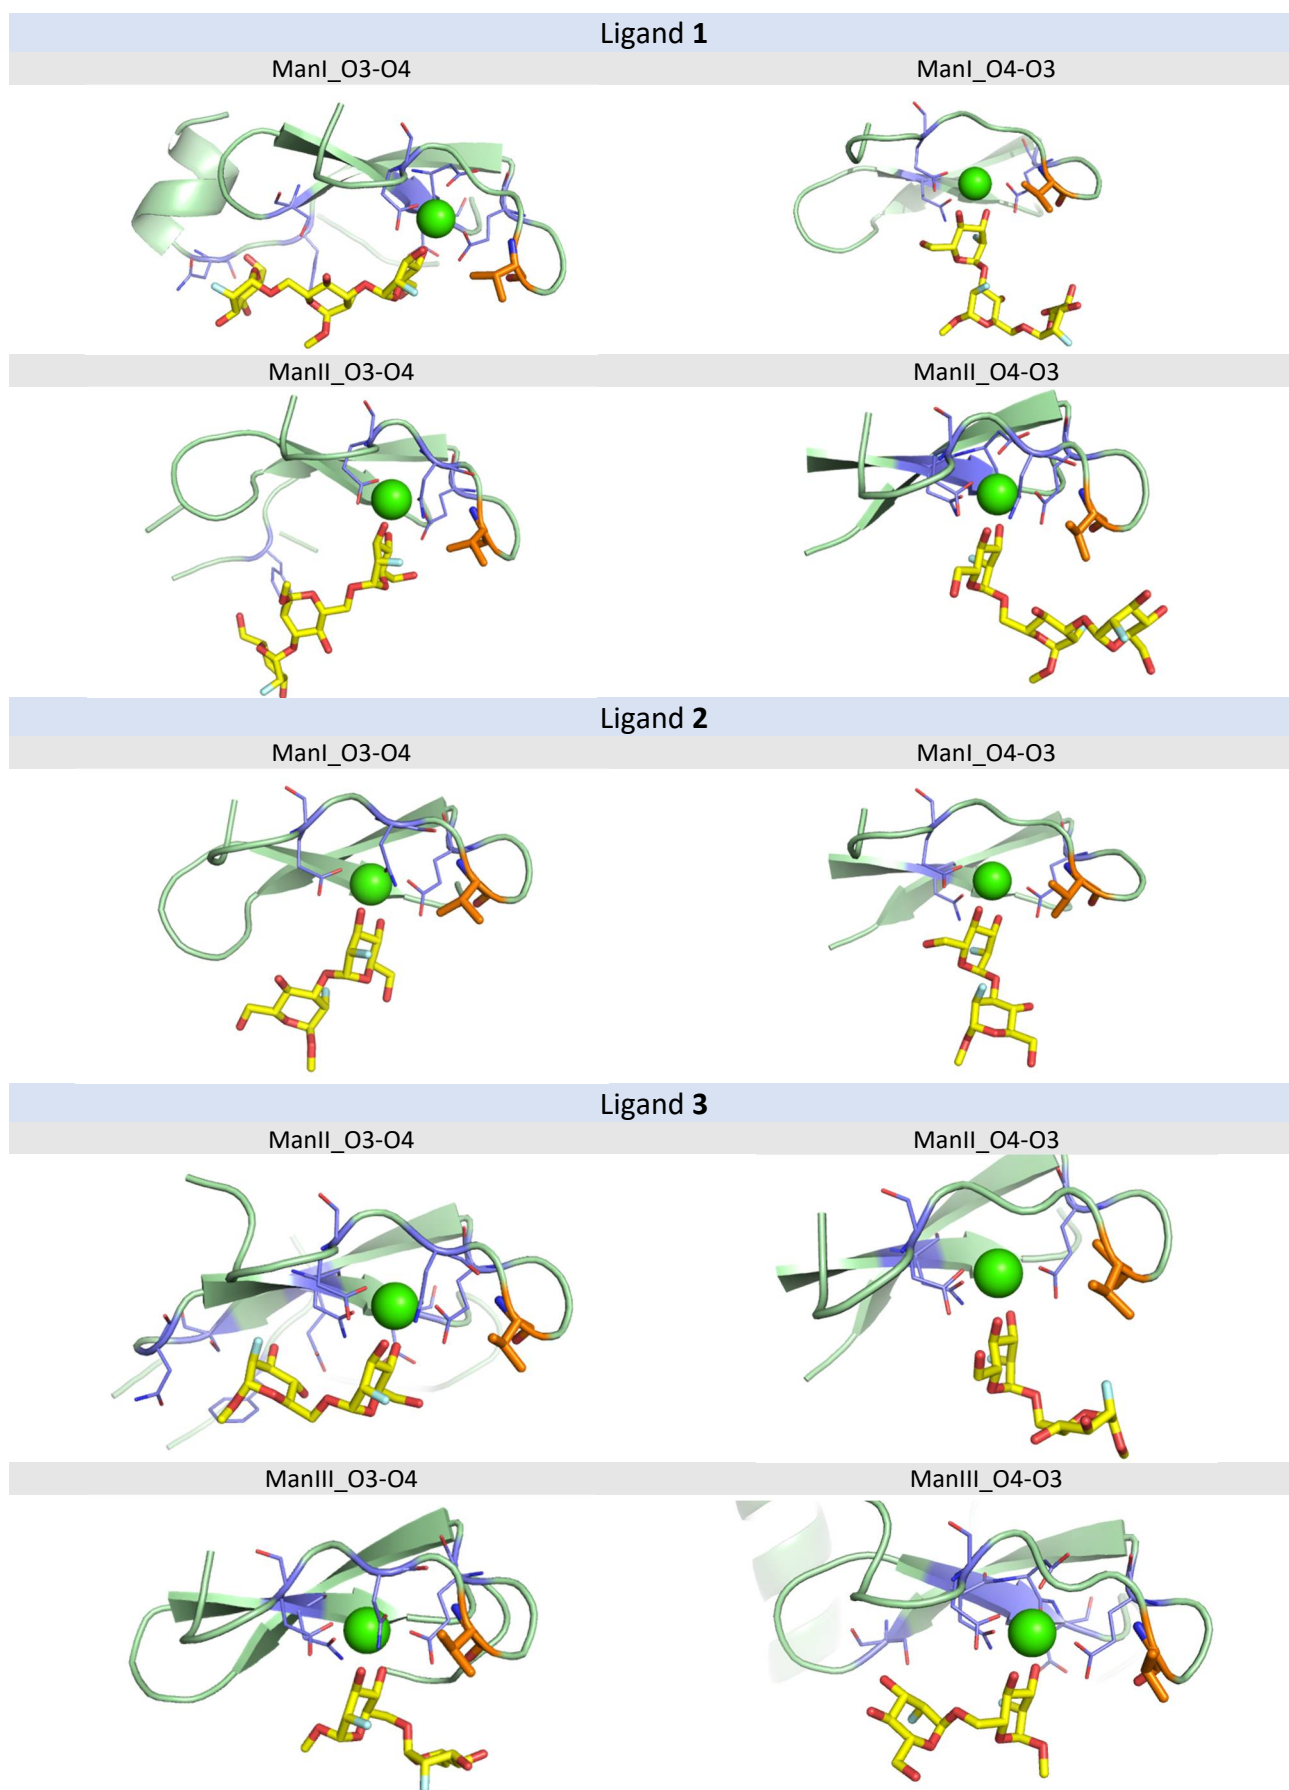

**Figure S3. Selected MD frames:** Representative optimized structures of each proposed binding mode for 1, 2 and 3 in complex with DC-SIGN after system minimization of the first MD replica.

### Ligand 1

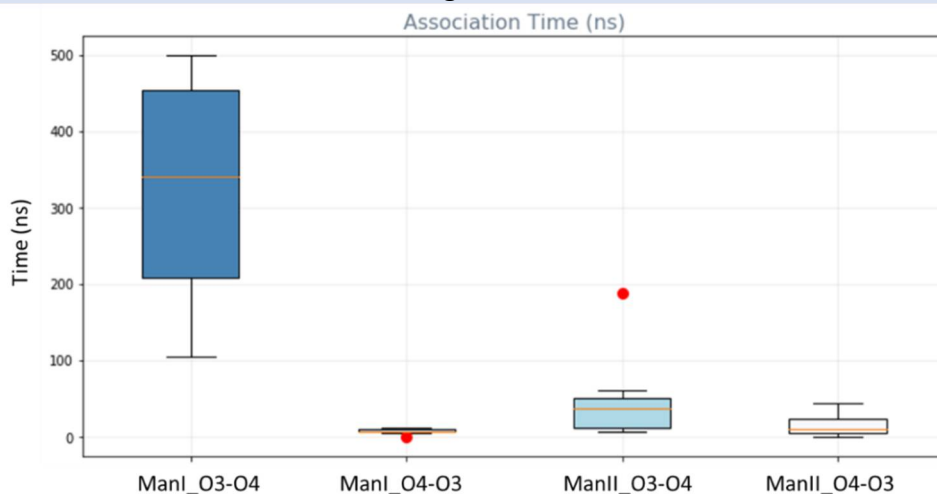

### Ligand 2

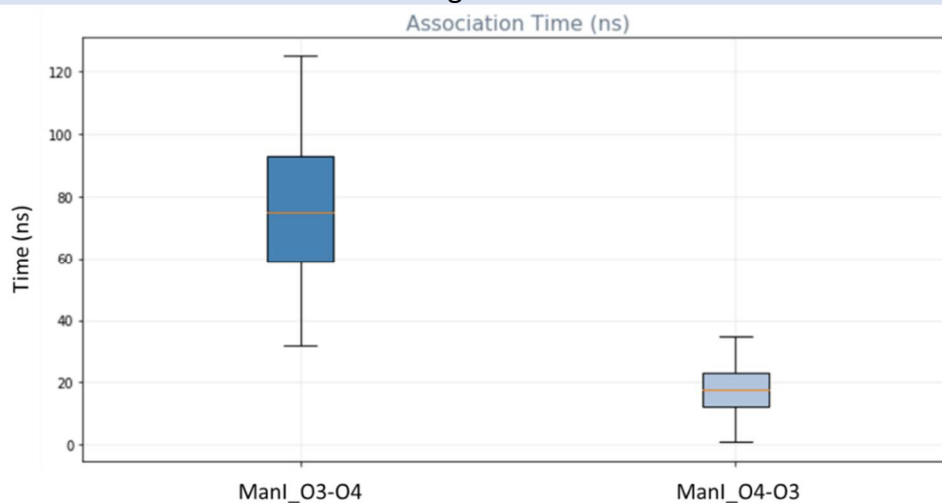

### Ligand 3

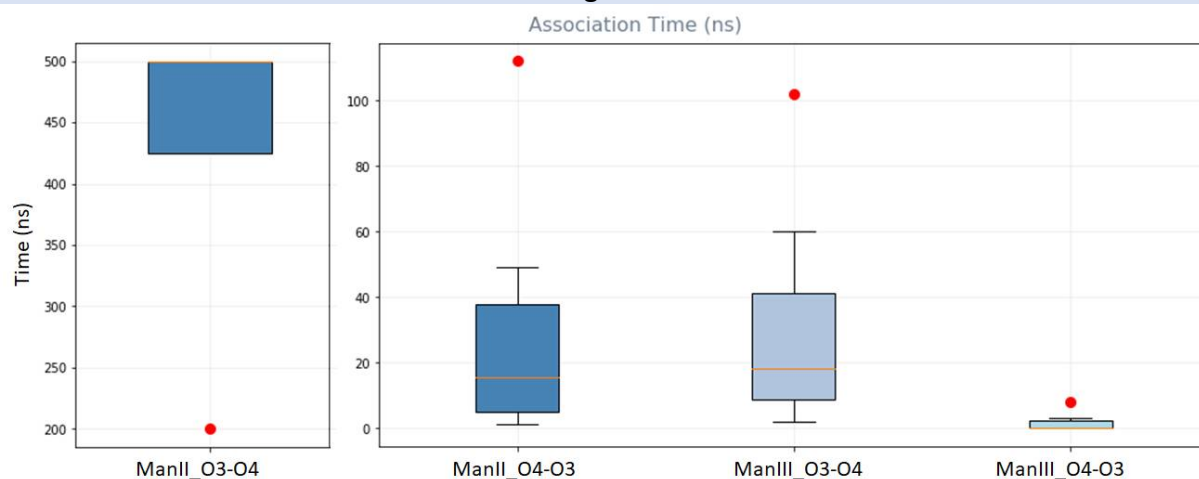

**Figure S4. MD derived complexes association times:** Box plot representation of association times observed in the MD simulations of the different ligand-protein complexes. The number of MD replicas ran in each case varies from 6 to 12, depending on the variability observed. Outliers are represented as red dots.



## Ligand 1

### ManI\_03-04

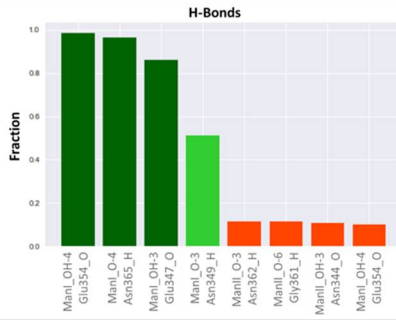

| Other Interactions |               |            |              |
|--------------------|---------------|------------|--------------|
| Type               | Ligand Group  | Amino acid | Fraction (%) |
| CH-Pi              | ManIII_H6/H6' | Phe313     | 8            |

## ManI\_04-03

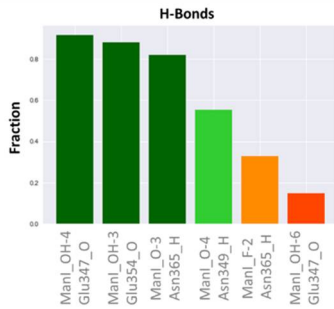

| Other Interactions |              |            |              |
|--------------------|--------------|------------|--------------|
| Type               | Ligand Group | Amino acid | Fraction (%) |
| VdW                | ManI_H-3     | Val351     | 21           |
| VdW                | ManII_H-4    | Val351     | 29           |
| VdW                | ManIII_H-3   | Val351     | 27           |
| VdW                | ManIII_H-5   | Val351     | 23           |

## ManII\_03-04

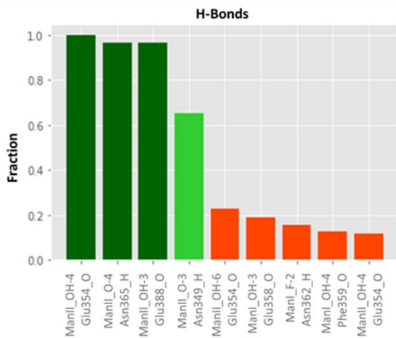

| Other Interactions |              |            |              |
|--------------------|--------------|------------|--------------|
| Type               | Ligand Group | Amino acid | Fraction (%) |
| VdW                | ManIII_H-4   | Val351     | 20           |

## ManII\_04-03

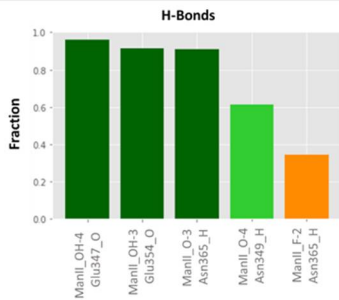

| Other Interactions |              |            |              |
|--------------------|--------------|------------|--------------|
| Type               | Ligand Group | Amino acid | Fraction (%) |
| VdW                | ManI_H-3     | Val351     | 50           |
| VdW                | ManI_H-5     | Val351     | 15           |
| VdW                | ManII_H-3    | Val351     | 40           |
| VdW                | ManIII_H-3   | Val351     | 10           |
| VdW                | ManIII_H-4   | Val351     | 13           |

## Ligand 2

### ManIII\_03-04

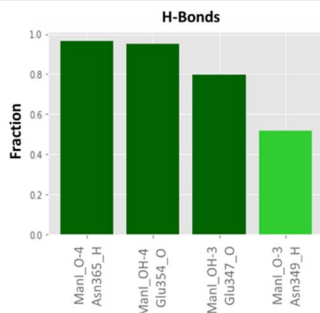

### ManI\_O4-O3

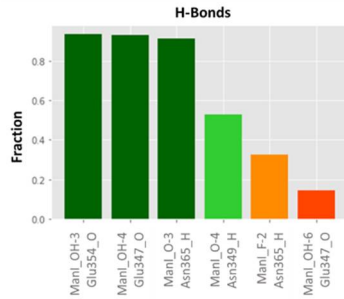

| Other Interactions |              |            |              |
|--------------------|--------------|------------|--------------|
| Type               | Ligand Group | Amino acid | Fraction (%) |
| VdW                | ManI_H-3     | Val351     | 12           |
| VdW                | ManII_H-4    | Val351     | 14           |

### Ligand 3

### ManII\_O3-O4

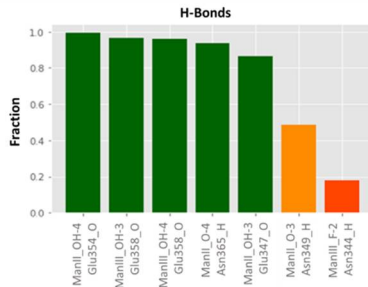

| Other Interactions |              |            |              |
|--------------------|--------------|------------|--------------|
| Type               | Ligand Group | Amino acid | Fraction (%) |
| CH-Pi              | ManIII_H-3   | Phe313     | 70           |

### ManII\_O4-O3

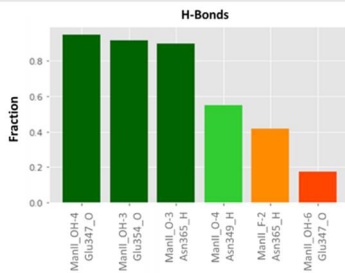

| Other Interactions |              |            |              |
|--------------------|--------------|------------|--------------|
| Type               | Ligand Group | Amino acid | Fraction (%) |
| VdW                | ManII_H-3    | Val351     | 27           |

### ManIII\_O3-O4

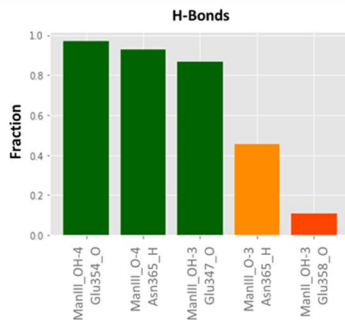

### ManIII\_O4-O3

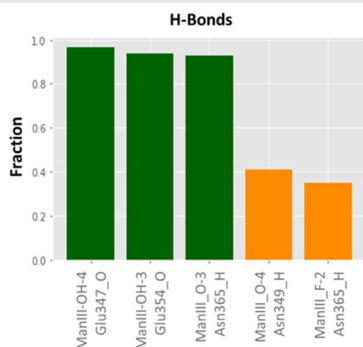

**Figure S5. Ligand-protein interactions:** Significant ligand-protein interactions computed during the MD replicas. The fraction axis shows the percentage of the simulation time that the interaction is found.

Hydrogen-bonds are accounted from the MD trajectories based on distance and angle criteria:  $d_{(A-H-D)} < 3 \text{ \AA}$  and  $(A-H-D) < 130^\circ$ , where H refers to the coordinates of the hydrogen atom, D and A the hydrogen bond donor and acceptor respectively. Similarly, CH-Pi interactions are accounted by the distance of the aromatic ring-center to the hydrogen atom involved in the interaction according to  $d_{(Ring-H)} < 3 \text{ \AA}$ , as well as the C/H/Ring-center angle  $(C-H-Ring) > 120^\circ$ . Van der Waals interactions are considered when the interatomic distance of the atoms involved is lower than 1.2 times the sum of the VdW radii of the atoms.

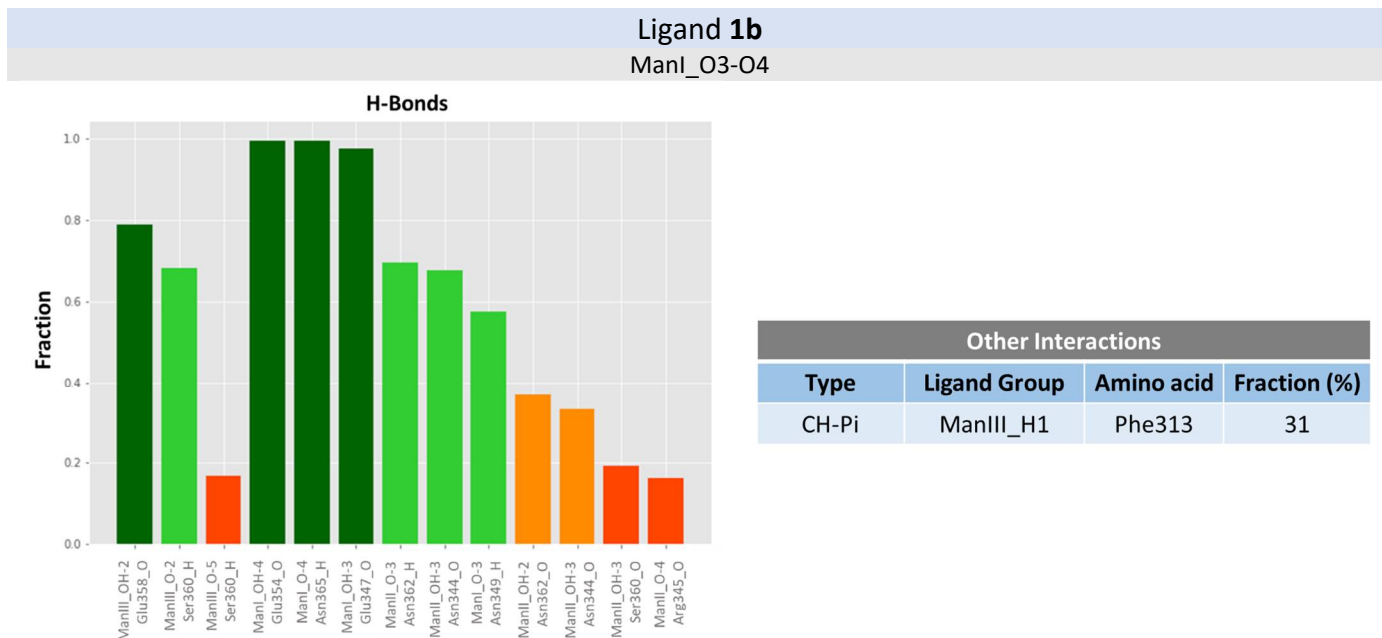

**Figure S6. Ligand-protein interactions for ligand 1b:** Significant ligand-protein interactions computed during the MD of DC-SIGN bound to **1b** *via* ManI\_O3-O4. All interactions are accounted in the same way as described in Figure S5

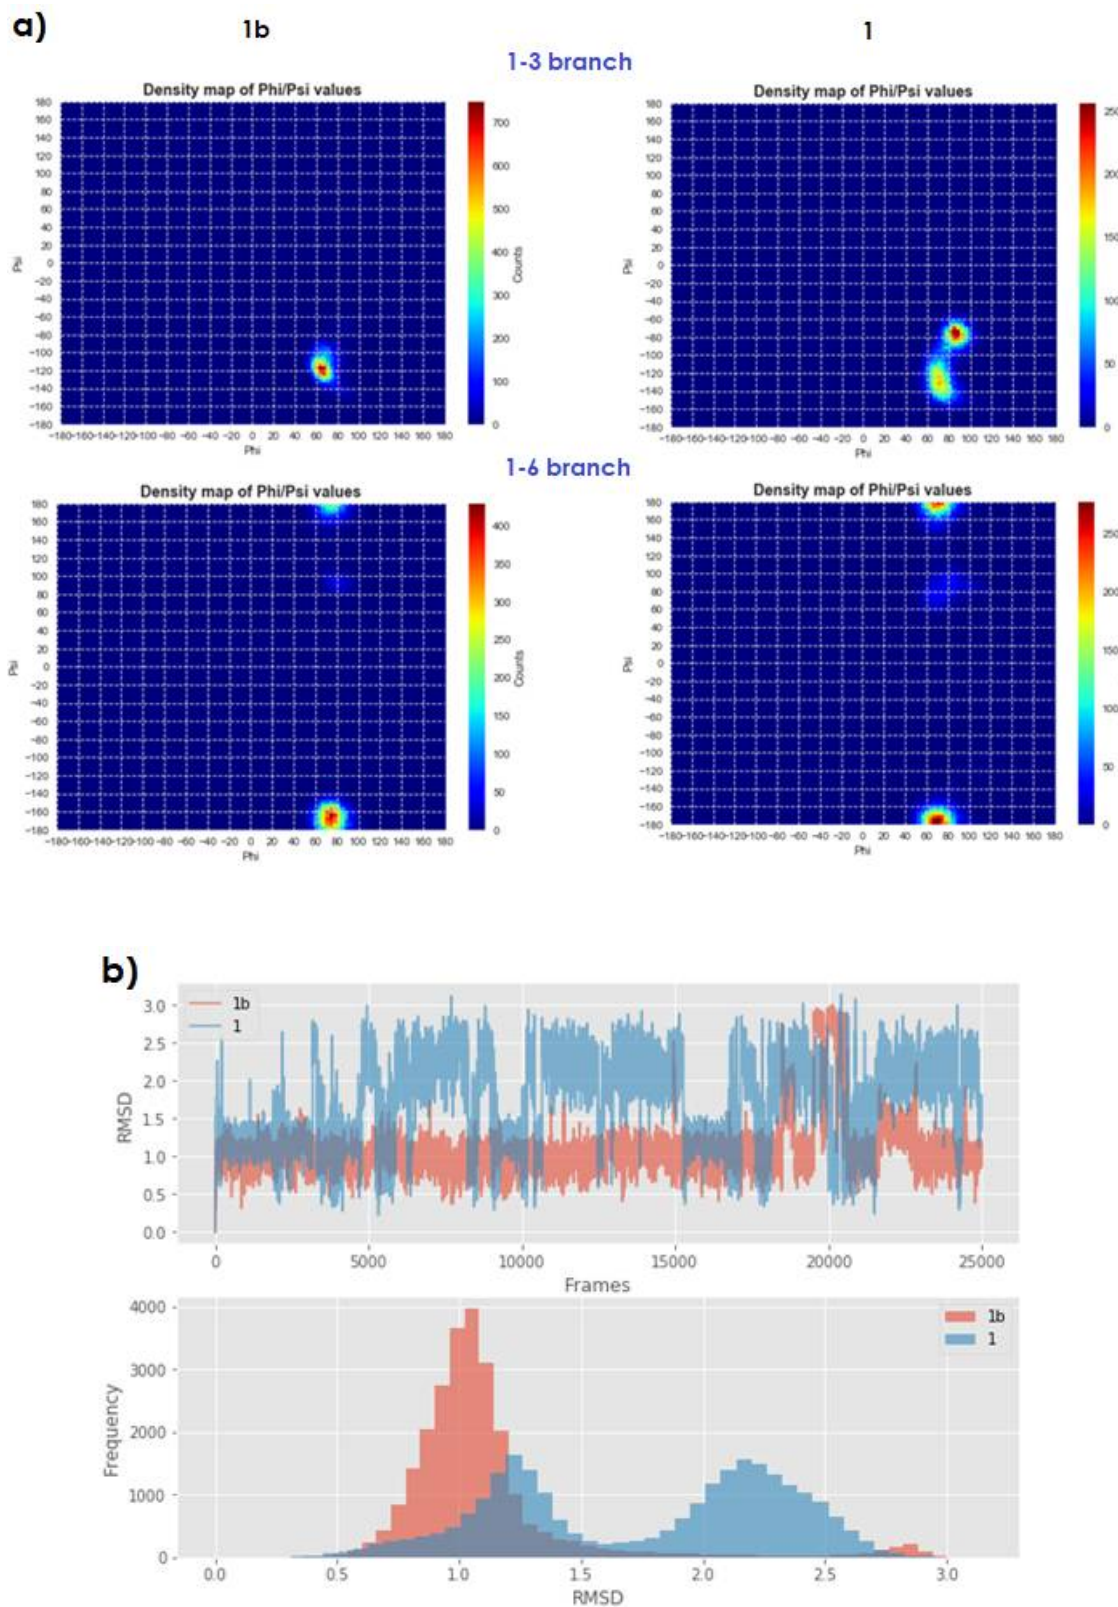

**Figure S7. Conformational population comparisons:** Comparison the populations around  $\phi/\psi$  torsion angles (a) and the RMSD (b) of the ligands computed in a 500 ns MD simulation of **1** and **1b** bound *via* ManI\_O3-O4 to DC-SIGN. It can be observed the larger mobility of the glycomimetic **1** with respect to the natural trimannose **1b** at the binding site when bound through the same pose.

## CORCEMA-ST

The CORCEMA-ST script was ran sequentially for 400-800 frames extracted from each MD simulation trajectory. The same experimental parameters employed in the STD-NMR experiments were used in the calculations: [DC-SIGN] = 9.14  $\mu\text{M}$ , [Ligand] = 1.4 mM, 2 s saturation time. Different  $k_{\text{on}}$  values in the range of  $10^5$ - $10^8 \text{ M}^{-1} \text{ s}^{-1}$  and  $K_{\text{D}}$  0.5-3 mM were tested with all the complexes, giving rise to very similar normalized calculated STD profiles. Thus, a  $k_{\text{on}}$  of  $10^6 \text{ M}^{-1} \text{ s}^{-1}$ , of the same order of other sugar-lectin systems [1,2], was used for all the models.  $K_{\text{D}}$  was set to 1 mM, similar to the observed  $K_{\text{D}}$  of other Man derivatives in complex with DC-SIGN [3-5]. An instantaneous irradiation of the aliphatic receptor residues Ile, Leu, and Val methylgroups to account for the selective on-resonance irradiation of the STD-NMR experiment, 0.85 ppm, was used. The size of the relaxation matrix was adjusted using a distance cutoff,  $d$ , of 10 Å away from any ligand atom, since virtually the same STD profiles were obtained for larger values, while some differences appeared when  $d < 10$  Å. The value of the order parameter  $S^2$  and the methyl group internal correlation time  $\tau_{\text{m}}$  were set to 0.85 and 10 ps respectively, as previously described [6]. A typical value for the free ligand correlation time  $\tau_{\text{L}} = 0.5$  ns was used, whereas for the bound ligand a correlation time assuming a tetrameric protein of globular shape was estimated as  $\tau_{\text{b}} = 85$  ns.

Since CORCEMA-ST does not recognize  $^{19}\text{F}$  as an active nucleus in the relaxation matrix, the effect of the presence of an active nuclei at position C-2 in the 2-F compounds **1**, **2** and **3**, was assessed by substituting all fluorine atoms by hydrogens in each analogue, while keeping the original C-F distance. Then, CORCEMA-ST calculations were ran with the same parameters described in the previous paragraph. This way, the  $^1\text{H}$  nucleus is used as a probe to simulate the most pronounced expectable effect (since it can give rise to homonuclear cross-relaxation) on the observed STD signals. Remarkably, it was found that the predicted best fitting models with *BM-Mixer* are in general unaffected by the presence of the active nucleus at C-2 for the three ligands (see Table S3).

## Best-model STD fitting

*BM-Mixer* is able to find the best combination of frames (in %) from different MD trajectories explaining the experimental STD-NMR data. For the program to work properly, it is important to use a list of experimental STDs only containing reliable assigned peaks. In this work, we used the list provided in Table 1 in the main text, with the exception of compound **3**. For compound **3**, the experimental STD cross peak observed for Man III at 3.7 ppm could correspond to H-3, H-4, H-5 or H-6'. As accounting the measured STD intensity as the sum of the individual contribution from four H atom would potentially introduce noise in the search (see *CORCEMA-ST and best-model STD fitting* heading in the experimental section), the corresponding STD peak was not taken into account in the search for best-model fitting showed in Figure 4 and Table S2.

There are two main parameters that must be set in a *BM-Mixer* run: *mix\_leap* and *search\_iterator*. *mix\_leap* defines the minimum percentage of frames to be used from each trajectory to explore the different combinations. For example, setting *mix\_leap* = 5 allows the program to combine frames from different trajectories using a minimum of 5 % of the frames. Although it depends on the number of frames and binding modes (trajectories) to work with, typically a value of *mix\_leap* = 10 is sufficient to get accurate enough results (according to NOE R-Factor<sub>Rel</sub>) in a decent amount of time. *search\_iterator* specify how many times the program is run before computing the final NOE R-Factor<sub>Rel</sub> averages. Every time a new iteration start (when

$search\_iterator > 1$ ), the frames used in each combination are randomly selected, so that the larger the value of  $search\_iterator$ , the better sampling of the trajectory-space is done. In general, we have found that for the studied systems, when using 400-800 frames of each binding mode trajectory, best NOE  $R\text{-Factor}_{Rel}$  averages are similar when setting  $search\_iterator > 15$ .

**Table S1. Best-model STD fitting by *BM-Mixer*:** Top 3 best-model STD fitting results for each ligand, found by *BM-Mixer*. For ligands **1** and **3**, 800 frames from each simulated binding mode were used in the calculations, while 400 frames were employed for **2**.  $mix\_leap$  was set to 10 for ligands **1** and **3**, and to 5 for **2**; a  $search\_iterator$  of 30 was used in all cases.

| Ligand 1        |                 |                             |                             |                             |
|-----------------|-----------------|-----------------------------|-----------------------------|-----------------------------|
| ManI_O3-O4 (%)  | ManI_O4-O3 (%)  | ManII_O3-O4 (%)             | ManII_O4-O3 (%)             | NOE $R\text{-Factor}_{Rel}$ |
| 60              | 0               | 0                           | 40                          | 0.2010                      |
| 50              | 0               | 0                           | 50                          | 0.2201                      |
| 40              | 0               | 10                          | 50                          | 0.2238                      |
| Ligand 2        |                 |                             |                             |                             |
| ManI_O3-O4 (%)  | ManI_O4-O3 (%)  | NOE $R\text{-Factor}_{Rel}$ |                             |                             |
| 65              | 35              | 0.1380                      |                             |                             |
| 60              | 40              | 0.1396                      |                             |                             |
| 70              | 30              | 0.1575                      |                             |                             |
| Ligand 3        |                 |                             |                             |                             |
| ManII_O3-O4 (%) | ManII_O4-O3 (%) | ManIII_O3-O4 (%)            | NOE $R\text{-Factor}_{Rel}$ |                             |
| 50              | 10              | 40                          | 0.1470                      |                             |
| 50              | 0               | 50                          | 0.1482                      |                             |
| 40              | 10              | 50                          | 0.1496                      |                             |

**Table S3. Best-model STD fitting by *BM-Mixer* with non-fluorinated control** Top 3 best-model STD fitting results found by *BM-Mixer* for each ligand-control CORCEMA-ST calculated STD. Ligand-controls were built by substituting all fluorine atoms in the MD trajectories by hydrogens, and then computing CORCEMA-ST on those. The same *BM-Mixer* set up described in Table S2 was used.

| Ligand 1        |                 |                             |                             |                             |
|-----------------|-----------------|-----------------------------|-----------------------------|-----------------------------|
| ManI_O3-O4 (%)  | ManI_O4-O3 (%)  | ManII_O3-O4 (%)             | ManII_O4-O3 (%)             | NOE $R\text{-Factor}_{Rel}$ |
| 60              | 0               | 0                           | 40                          | 0.2143                      |
| 40              | 0               | 10                          | 50                          | 0.2212                      |
| 40              | 0               | 10                          | 50                          | 0.2368                      |
| Ligand 2        |                 |                             |                             |                             |
| ManI_O3-O4 (%)  | ManI_O4-O3 (%)  | NOE $R\text{-Factor}_{Rel}$ |                             |                             |
| 70              | 30              | 0.1467                      |                             |                             |
| 65              | 35              | 0.1538                      |                             |                             |
| 75              | 25              | 0.1681                      |                             |                             |
| Ligand 3        |                 |                             |                             |                             |
| ManII_O3-O4 (%) | ManII_O4-O3 (%) | ManIII_O3-O4 (%)            | NOE $R\text{-Factor}_{Rel}$ |                             |
| 50              | 0               | 50                          | 0.1555                      |                             |
| 40              | 10              | 50                          | 0.1645                      |                             |
| 50              | 10              | 40                          | 0.1654                      |                             |

## References

1. Scharenberg, M.; Jiang, X.; Pang, L.; Navarra, G.; Rabbani, S.; Binder, F.; Schwardt, O.; Ernst, B. Kinetic properties of carbohydrate-lectin interactions: FimH antagonists. *ChemMedChem* **2014**, *9*, 78–83.
2. Milton, J.D.; Fernig, D.G.; Rhodes, J.M. Use of a biosensor to determine the binding kinetics of five lectins for Galactosyl-N-acetylgalactosamine. *Glycoconj. J.* **2001**, *18*, 565–569.
3. Holla, A.; Skerra, A. Comparative analysis reveals selective recognition of glycans by the dendritic cell receptors DC-SIGN and Langerin. *Protein Eng. Des. Sel.* **2011**, *24*, 659–669.
4. Bordoni, V.; Porkolab, V.; Sattin, S.; Thépaut, M.; Frau, I.; Favero, L.; Crotti, P.; Bernardi, A.; Fieschi, F.; Di Bussolo, V. Stereoselective innovative synthesis and biological evaluation of new real carba analogues of minimal epitope Man $\alpha$ (1,2)Man as DC-SIGN inhibitors. *RSC Adv.* **2016**, *6*, 89578–89584.
5. Reina, J.J.; Sattin, S.; Invernizzi, D.; Mari, S.; Martinez-Prats, L.; Tabarani, G.; Fieschi, F.; Delgado, R.; Nieto, P.M.; Rojo, J.; et al. 1,2-mannobioside mimic: Synthesis, DC-SIGN interaction by NMR and docking, and antiviral activity. *ChemMedChem* **2007**, *2*, 1030–1036.
6. Jayalakshmi, V.; Krishna, N.R. Complete relaxation and conformational exchange matrix (CORCEMA) analysis of intermolecular saturation transfer effects in reversibly forming ligand-receptor complexes. *J. Magn. Reson.* **2002**, *155*, 106–118.
